# Supplementary material
Source: HighWire-hosted journal article supplement (https://rmdopen.bmj.com/content/8/1/e002203)
Supplement: inline-supplementary-material-2 [file inline-supplementary-material-2.pdf]

## Supplemental Table 2: Demographics

|                                  | Total<br>(198) | Adjust<br>(86) | No Adjust<br>(112) | p    |
|----------------------------------|----------------|----------------|--------------------|------|
| Age, median                      | 69             | 68             | 70                 | 0.53 |
| Sex, no. (%):                    |                |                |                    | 0.60 |
| Female                           | 153 (77)       | 68 (79)        | 85 (76)            |      |
| Male                             | 45 (23)        | 18 (21)        | 27 (24)            |      |
| Vaccine Type, no. (%):           |                |                |                    | 0.19 |
| BNT162b2                         | 144 (73)       | 59 (69)        | 85 (76)            |      |
| mRNA-1273                        | 49 (24)        | 26 (30)        | 23 (20)            |      |
| Ad26COV2 S                       | 5 (3)          | 1 (1)          | 4 (4)              |      |
| Diagnosis, no. (%): <sup>^</sup> |                |                |                    | 0.54 |
| Rheumatoid Arthritis             | 164 (77)       | 78 (88)        | 86 (71)            |      |
| Psoriatic Arthritis              | 12 (6)         | 5 (6)          | 7 (6)              |      |
| Systemic lupus erythematosus     | 9 (5)          | 3 (3)          | 6 (5)              |      |
| Sjogren's syndrome               | 4 (2)          | 0 (0)          | 4 (3)              |      |
| Inflammatory bowel disease       | 4 (2)          | 1 (1)          | 3 (2)              |      |
| Granulomatous polyangiitis       | 4 (2)          | 1 (1)          | 3 (2)              |      |
| Dermato-/polymyositis            | 3 (2)          | 0 (0)          | 3 (2)              |      |
| Other                            | 10*            | 1**            | 9***               |      |

<sup>^</sup> patients can have more than one diagnosis

\* 1 each of axial spondyloarthritis, progressive systemic sclerosis, Behcet's disease, Still's disease, myasthenia gravis, alopecia, atopic dermatitis, MS, APS, IPF

\*\*Stills

\*\*\*Alopecia, Atopic Dermatitis, Behcet's, MS, MG, APS, Axial Spondyloarthritis, PSS, IPF
